# Supplementary material
Source: PubMed Central journal article supplement (PMC6587940)
Supplement: kxy013_supplementary_appendix.pdf [file kxy013_supplementary_appendix.pdf]

## Web Supplementary Materials for “Evaluating longitudinal markers under two-phase study designs”

MARLENA MAZIARZ, TIANXI CAI, LI QI, ANNA LOK & YINGYE ZHENG

### APPENDIX

#### APPENDIX A. DESIGN-BASED TRUE SAMPLING WEIGHT FROM TWO-PHASE STUDIES

We consider here two-phase studies where all longitudinal samples from individuals selected into the subcohort are measured, therefore  $\pi_{ij} \equiv \pi_i$ . The form of  $\pi_i$  can be obtained explicitly for both stratified case cohort (sCCH) (Gray, 2009; Liu *and others*, 2012) and nested case-control (NCC) studies (Samuelsen, 1997; Cai and Zheng, 2011) designs with a discrete stratification/matching variable  $\mathbf{Z}$  taking  $S$  unique values,  $\mathbf{z}_1, \dots, \mathbf{z}_S$ . Specifically, for sCCH design,

$$\pi_i = \sum_{d=0}^1 \sum_{s=1}^S \frac{n_{ds} I(\Delta_i = d, \mathbf{Z}_i = \mathbf{z}_s)}{\sum_{j=1}^n I(\Delta_j = d, \mathbf{Z}_j = \mathbf{z}_s)}$$

where  $n_{ds}$  is the number of subjects sampled from the set  $\{i : \Delta_i = d, \mathbf{Z}_i = \mathbf{z}_s\}$ , typically specified by design. For a matched NCC (mNCC) design with  $m$  controls matched to each case on the matching variable  $\mathbf{Z}$ ,  $\pi_i$  can be calculated as  $\tilde{\pi}_i = \Delta_i + (1 - \Delta_i)\{1 - \tilde{G}(\mathbf{W}_i)\}$ , with

$$\tilde{G}(\mathbf{W}_i) = \prod_{j: X_j \leq X_i} \left\{ 1 - \frac{m \Delta_j I(\mathbf{Z}_j = \mathbf{Z}_i)}{\sum_{k=1}^n I(X_k \geq X_j, \mathbf{Z}_k = \mathbf{Z}_i) - 1} \right\}. \quad (\text{A.1})$$

\*To whom correspondence should be addressed.

APPENDIX B. ASYMPTOTIC LINEAR EXPANSION OF  $\widehat{R}_i(\tau_0|s_{ij})$ 

We first show that  $\widehat{\beta}_{\tau_0}$  in Equation (3) is consistent for  $\beta_{\tau_0}$ . For simplicity, we drop the subscript of  $\widehat{\beta}_{\tau_0}$  and denote the true value of  $\beta_{\tau_0}$  by  $\beta_0$ . Denote

$$\mathcal{R}_i(\beta, s_{ij}, \tau_0) = \mathcal{H}_i(s_{ij}) \{I(X_i \leq s_{ij} + \tau_0) - g\{\beta^\top \mathcal{H}_i(s_{ij})\}\}$$

where  $\mathcal{H}_i(s_{ij})$  is a vector of partial longitudinal information collected up to time  $s_{ij}$  and may include some flexible functionals of components in  $\mathbf{H}_i(s_{ij})$ , the observed covariate information up to time  $s_{ij}$  for subject  $i$ . Assume that  $\widehat{\pi}_{ij}^{\mathbb{S}} = P(\xi_{ij} = 1 | \mathbf{w}_{ij})$  is modeled correctly by (2) with parameters denoted by  $\gamma$ , where  $\mathbf{w}_{ij} = (X_i, \Delta_i, \mathbf{A}_{ij}^\top)^\top$  (See section 3.1 of the main paper). The estimator using Nadaraya-Watson weights can be derived under similar conditions and procedures in Appendix A of Qi, Wang and Prentice (2005), and is thus omitted here. The estimators of  $\beta$  and  $\gamma$  can be obtained simultaneously by solving estimation equation

$$U(\beta, \gamma) = \begin{pmatrix} U^\beta(\beta, \gamma) \\ U^\gamma(\gamma) \end{pmatrix} = 0,$$

where

$$U^\beta(\beta, \gamma) = \frac{1}{n} \sum_{i=1}^n \sum_{j=1}^{m_i} \frac{\xi_{ij}}{\pi_{ij}^{\mathbb{S}}(\gamma)} \widehat{w}_{ij}^{\mathbb{C}}(\tau_0) \mathcal{R}_i(\beta, s_{ij}, \tau_0),$$

and

$$U^\gamma(\gamma) = \frac{1}{n} \sum_{i=1}^n \sum_{j=1}^{m_i} \{\xi_{ij} - \pi_{ij}^{\mathbb{S}}(\gamma)\} \frac{\partial \pi_{ij}^{\mathbb{S}}(\gamma)}{\partial \gamma}.$$

Note that  $U^\beta(\beta, \gamma)$  can be written as

$$\frac{1}{n} \sum_{i=1}^n \sum_{j=1}^{m_i} \frac{\xi_{ij}}{\pi_{ij}^{\mathbb{S}}(\gamma)} w_{ij}^{\mathbb{C}}(\tau_0) \mathcal{R}_i(\beta, s_{ij}, \tau_0) + \frac{1}{n} \sum_{i=1}^n \sum_{j=1}^{m_i} \frac{\xi_{ij}}{\pi_{ij}^{\mathbb{S}}(\gamma)} (\widehat{w}_{ij}^{\mathbb{C}}(\tau_0) - w_{ij}^{\mathbb{C}}(\tau_0)) \mathcal{R}_i(\beta, s_{ij}, \tau_0).$$

The second term is bounded by

$$\max_{i,j} |\widehat{w}_{ij}^{\mathbb{C}}(\tau_0) - w_{ij}^{\mathbb{C}}(\tau_0)| \times \frac{1}{n} \sum_{i=1}^n \sum_{j=1}^{m_i} \frac{\xi_{ij}}{\pi_{ij}^{\mathbb{S}}(\gamma)} |\mathcal{R}_i(\beta, s_{ij}, \tau_0)|.$$

The empirical sum converges by the law of large numbers and the term  $\max_{i,j} |\widehat{w}_{ij}^{\mathbb{C}}(\tau_0) - w_{ij}^{\mathbb{C}}(\tau_0)| \rightarrow 0$  in probability since the Kaplan-Meier estimator is uniformly consistent. Thus, it turns out that

$$U^\beta(\boldsymbol{\beta}, \boldsymbol{\gamma}) = \frac{1}{n} \sum_{i=1}^n \sum_{j=1}^{m_i} \frac{\xi_{ij}}{\pi_{ij}^{\mathbb{S}}(\boldsymbol{\gamma})} w_{ij}^{\mathbb{C}}(\tau_0) \mathcal{R}_i(\boldsymbol{\beta}, s_{ij}, \tau_0) + o_p(1).$$

Take partial derivative of  $U^\beta(\boldsymbol{\beta}, \boldsymbol{\gamma})$  with respect to  $\boldsymbol{\beta}$ , we have

$$\begin{aligned} \left. \frac{\partial U^\beta(\boldsymbol{\beta}, \boldsymbol{\gamma})}{\partial \boldsymbol{\beta}} \right|_{\boldsymbol{\beta}=\boldsymbol{\beta}_0} &= -\frac{1}{n} \sum_{i=1}^n \sum_{j=1}^{m_i} \frac{\xi_{ij}}{\pi_{ij}^{\mathbb{S}}(\boldsymbol{\gamma})} \widehat{w}_{ij}^{\mathbb{C}}(\tau_0) \mathcal{H}_i(s_{ij}) \mathcal{H}_i(s_{ij})^T \dot{g}\{\boldsymbol{\beta}_0^T \mathcal{H}_i(s_{ij})\} \\ &\xrightarrow{\mathcal{P}} \sum_{j=1}^{m_i} E [w_{ij}^{\mathbb{C}}(\tau_0) w_{ij}^{\mathbb{S}} \mathcal{H}_i(s_{ij}) \mathcal{H}_i(s_{ij})^T \dot{g}\{\boldsymbol{\beta}_0^T \mathcal{H}_i(s_{ij})\}] \equiv I^\beta \end{aligned}$$

uniformly in a neighborhood of  $\boldsymbol{\beta}_0$ . Clearly,  $\frac{\partial U^\gamma(\boldsymbol{\gamma})}{\partial \boldsymbol{\beta}} = 0$ . It can be shown that  $\frac{\partial U^\gamma(\boldsymbol{\gamma})}{\partial \boldsymbol{\gamma}}$  converges to its limit  $I^\gamma$  and  $\frac{\partial U^\beta(\boldsymbol{\beta}, \boldsymbol{\gamma})}{\partial \boldsymbol{\gamma}}$  converges to its limit  $I^{\beta\gamma}$  and denote

$$I = \begin{pmatrix} I^\beta & I^{\beta\gamma} \\ 0 & I^\gamma \end{pmatrix}.$$

Because  $\det(I^\beta) \neq 0$ ,  $\det(I^\gamma) \neq 0$ ,  $\det(I^{\beta\gamma}) \neq 0$ , and  $\det(I^{\beta\beta}) = 0$ ,  $I$  is invertible. Following the same argument as in the proof of Theorem 2 of Xu *and others* (2009), we have the existence and consistency of  $\hat{\boldsymbol{\gamma}}$  and  $\hat{\boldsymbol{\beta}}(\hat{\boldsymbol{\gamma}})$ .

Now we show the asymptotic expansion of  $n^{1/2}U^\beta(\boldsymbol{\beta}, \boldsymbol{\gamma})$ . It can be written as

$$\frac{1}{\sqrt{n}} \sum_{i=1}^n \sum_{j=1}^{m_i} \frac{\xi_{ij}}{\pi_{ij}^{\mathbb{S}}(\boldsymbol{\gamma})} w_{ij}^{\mathbb{C}}(\tau_0) \mathcal{R}_i(\boldsymbol{\beta}, s_{ij}, \tau_0) + \frac{1}{\sqrt{n}} \sum_{i=1}^n \sum_{j=1}^{m_i} \frac{\xi_{ij}}{\pi_{ij}^{\mathbb{S}}(\boldsymbol{\gamma})} (\widehat{w}_{ij}^{\mathbb{C}}(\tau_0) - w_{ij}^{\mathbb{C}}(\tau_0)) \mathcal{R}_i(\boldsymbol{\beta}, s_{ij}, \tau_0).$$

Following from the asymptotic expansion of Kaplan-Meier estimator,

$$n^{\frac{1}{2}} \left\{ G(t)/\widehat{G}(t) - 1 \right\} = n^{-\frac{1}{2}} \sum_{i=1}^n \mathcal{U}_{G_i}(t) + o_p(1),$$

we have

$$n^{-1/2} \sum_{i=1}^n \sum_{j=1}^{R_i} \frac{\xi_{ij}}{\pi_{ij}^{\mathbb{S}}(\boldsymbol{\gamma})} (\widehat{w}_{ij}^{\mathbb{C}}(\tau_0) - w_{ij}^{\mathbb{C}}(\tau_0)) \mathcal{R}_i(\boldsymbol{\beta}, s_{ij}, \tau_0) = n^{-1/2} \sum_{i=1}^n \int \mathcal{U}_{G_i}(u) d\Phi(u) \quad (\text{B.1})$$

where  $\mathcal{U}_{G_i}(t) = \int_0^t P(X_i > u)^{-1} [I(X_i \leq u)(1 - \Delta_i) + I(X_i \geq u) d \log\{G(u)\}]$ , and

$$\Phi(u) = \sum_j^{m_i} E\{I(X_i \wedge s_{ij} + \tau_0 \leq u) w_{ij}^{\mathbb{C}}(\tau_0) \mathcal{R}_i(\boldsymbol{\beta}, s_{ij}, \tau_0)\}. \quad (\text{B.2})$$

iv

Hence,

$$\sqrt{n}(\hat{\beta} - \beta) = n^{-1/2} \sum_{i=1}^n \zeta_i(\tau_0 | s),$$

where

$$\zeta_i(\tau_0 | s) = \mathcal{T}I^{-1} \left( \frac{\sum_{j=1}^{m_i} \frac{\xi_{ij}}{\pi_{ij}^{\mathbb{S}}(\gamma)} w_{ij}^{\mathbb{C}}(\tau_0) \mathcal{R}_i(\beta, s_{ij}, \tau_0) + \int \mathcal{U}_{G_i}(u) d\Phi(u)}{\sum_{j=1}^{m_i} \{\xi_{ij} - \pi_{ij}^{\mathbb{S}}(\gamma)\} \frac{\partial \pi_{ij}^{\mathbb{S}}(\gamma)}{\partial \gamma}} \right),$$

and  $\mathcal{T} = \{\mathcal{T}_{jk}\}$  be a  $p_1 \times (p_1 + p_2)$  matrix with elements  $\mathcal{T}_{jk} = 1$  for  $j = 1, \dots, p_1$ ,  $k = j$ ,

and  $\mathcal{T}_{jk} = 0$  otherwise, where  $p_1$  is the length of  $\beta$  and  $p_2$  is the length of  $\gamma$ . Then  $\widehat{\mathcal{U}}_{\mathcal{R}}(\tau_0 | s) =$

$\sqrt{n} \left[ \widehat{R}_i(\tau_0 | s) - R_i(\tau_0 | s) \right]$  is asymptotically equivalent to a sum of  $i$  terms,  $n^{-1/2} \sum_{i=1}^n \{\zeta_i(\tau_0 | s) \frac{\partial R_i(\tau_0 | s)}{\partial \beta}\} \equiv n^{-1/2} \sum_{i=1}^n \zeta_{R_i}(\tau_0 | s)$ .

#### APPENDIX C. ASYMPTOTIC LINEAR EXPANSION OF LONGITUDINAL SUMMARY MEASURES $\mathcal{A}_{s, \tau_0}$

Let  $\mathcal{U}_{\mathcal{A}_{s, \tau_0}} = \sqrt{n}(\widehat{\mathcal{A}}_{s, \tau_0} - \mathcal{A}_{s, \tau_0})$ . As an example, we consider  $\mathcal{A}_{s, \tau_0}$  in the case of  $\text{TPF}_{s, \tau_0}(\psi)$ .

Below we use  $\text{TPF}_{s, \tau_0}(\psi)$  to denote a simple setting where  $R_i(\tau_0 | s_{ij})$  is known with parameters estimated with another cohort, i.e.,

$$\widehat{\text{TPF}}_{s, \tau_0}(\psi) = \frac{\sum_{ij} \mathbf{I}(|s_{ij} - s| \leq \epsilon) \mathbf{I}(R_i(\tau_0 | s_{ij}) > \psi) \mathbf{I}(s < X_i \leq s + \tau_0) \widehat{w}_{ij}^{\mathbb{C}}(\tau_0) \widehat{w}_{ij}^{\mathbb{S}}}{\sum_{i=1}^n \sum_{j=1}^{m_i} \mathbf{I}(s < X_i \leq s + \tau_0) \widehat{w}_{ij}^{\mathbb{C}}(\tau_0) \widehat{w}_{ij}^{\mathbb{S}}}.$$

Let  $\mathcal{U}_{\text{TPF}_{s, \tau_0}}(\psi) = n^{1/2} \{\widehat{\text{TPF}}_{s, \tau_0}(\psi) - \text{TPF}_{s, \tau_0}(\psi)\}$ , we have

$$\mathcal{U}_{\text{TPF}_{s, \tau_0}}(\psi) = n^{-1/2} \sum_{i=1}^n \sum_{j=1}^{m_i} \frac{\xi_{ij}}{\pi_{ij}^{\mathbb{S}}(\hat{\gamma})} \widehat{w}_{ij}^{\mathbb{C}}(\tau_0) \zeta_{\text{TPF}, ij}(\psi), \quad (\text{C.1})$$

where  $\zeta_{\text{TPF}, ij}(\psi) = \frac{\mathbf{I}(s < X_i \leq s + \tau_0)}{1 - P(T > s + \tau_0)} \{\mathbf{I}(R_i(\tau_0 | s_{ij}) > \psi) \mathbf{I}(|s_{ij} - s| \leq \epsilon) - \text{TPF}_{s, \tau_0}(\psi)\}$ . Further, C.1

is equivalent to

$$\begin{aligned} & n^{-1/2} \sum_{i=1}^n \sum_{j=1}^{m_i} \frac{\xi_{ij}}{\pi_{ij}^{\mathbb{S}}(\hat{\gamma})} \widehat{w}_{ij}^{\mathbb{C}}(\tau_0) \zeta_{\text{TPF}, ij}(\psi) \\ & + n^{-1/2} \sum_{i=1}^n \sum_{j=1}^{m_i} \left\{ \frac{\xi_{ij}}{\pi_{ij}^{\mathbb{S}}(\hat{\gamma})} - \frac{\xi_{ij}}{\pi_{ij}^{\mathbb{S}}(\gamma)} \right\} \widehat{w}_{ij}^{\mathbb{C}}(\tau_0) \zeta_{\text{TPF}, ij}(\psi) \end{aligned} \quad (\text{C.2})$$

Following the same argument in Appendix B, the first term of (C.2) can be written as

$$n^{-1/2} \sum_{i=1}^n \left\{ \sum_{j=1}^{m_i} \frac{\xi_{ij}}{\pi_{ij}^{\mathbb{S}}(\hat{\gamma})} w_{ij}^{\mathbb{C}}(\tau_0) \zeta_{\text{TPF}, ij}(\psi) + \int \mathcal{U}_{G_i}(u) d\Phi_{\mathcal{A}}(u) \right\} \equiv n^{-1/2} \sum_{i=1}^n \eta_{1, \mathcal{A}_i}(\tau_0 | s),$$

where  $\Phi_{\mathcal{A}}(u) = E\{\sum_j^{m_i} I(X_i \wedge s_{ij} + \tau_0 \leq u) w_{ij}^{\mathbb{C}}(\tau_0) \zeta_{\text{TPF},ij}(\psi)\}$ , and the second term of (C.2) can be written as

$$\begin{aligned} & n^{-1/2} \sum_{i=1}^n \sum_{j=1}^{m_i} \frac{\xi_{ij}}{\pi_{ij}^{\mathbb{S}}(\gamma)^2} \{\pi_{ij}^{\mathbb{S}}(\hat{\gamma}) - \pi_{ij}^{\mathbb{S}}(\gamma)\} w_{ij}^{\mathbb{C}}(\tau_0) \zeta_{\text{TPF},ij}(\psi) \\ & + n^{-1/2} \sum_{i=1}^n \sum_{j=1}^{m_i} \frac{\xi_{ij}}{\pi_{ij}^{\mathbb{S}}(\gamma)^2} \{\pi_{ij}^{\mathbb{S}}(\hat{\gamma}) - \pi_{ij}^{\mathbb{S}}(\gamma)\} \{\widehat{w}_{ij}^{\mathbb{C}}(\tau_0) - w_{ij}^{\mathbb{C}}(\tau_0)\} \zeta_{\text{TPF},ij}(\psi) \end{aligned}$$

By the Taylor expansion and by expanding the form of  $\pi_{ij}^{\mathbb{S}}$ , the first term above is asymptotically equivalent to

$$n^{-1/2} I\gamma \sum_{i=1}^n \sum_{j=1}^{m_i} \{\xi_{ij} - \pi_{ij}^{\mathbb{S}}(\gamma)\} \frac{\partial \pi_{ij}^{\mathbb{S}}(\gamma)}{\partial \gamma} E \left\{ \sum_{j=1}^{m_i} \frac{1}{\pi_{ij}^{\mathbb{S}}(\gamma)} w_{ij}^{\mathbb{C}}(\tau_0) \zeta_{\text{TPF},ij}(\psi) \right\} \equiv n^{-1/2} \sum_{i=1}^n \eta_{2,\mathcal{A}i}(\tau_0|s)$$

and the second term is negligible. Therefore, we have

$$\mathcal{U}_{\text{TPF}_{s,\tau_0}} = n^{-1/2} \sum_{i=1}^n (\eta_{1,\mathcal{A}i} + \eta_{2,\mathcal{A}i}) \equiv n^{-1/2} \sum_i \eta_{\mathcal{A}i}(\tau_0|s).$$

## APPENDIX D. NESTED CASE-CONTROL SAMPLE OF THE HALT-C CLINICAL TRIAL

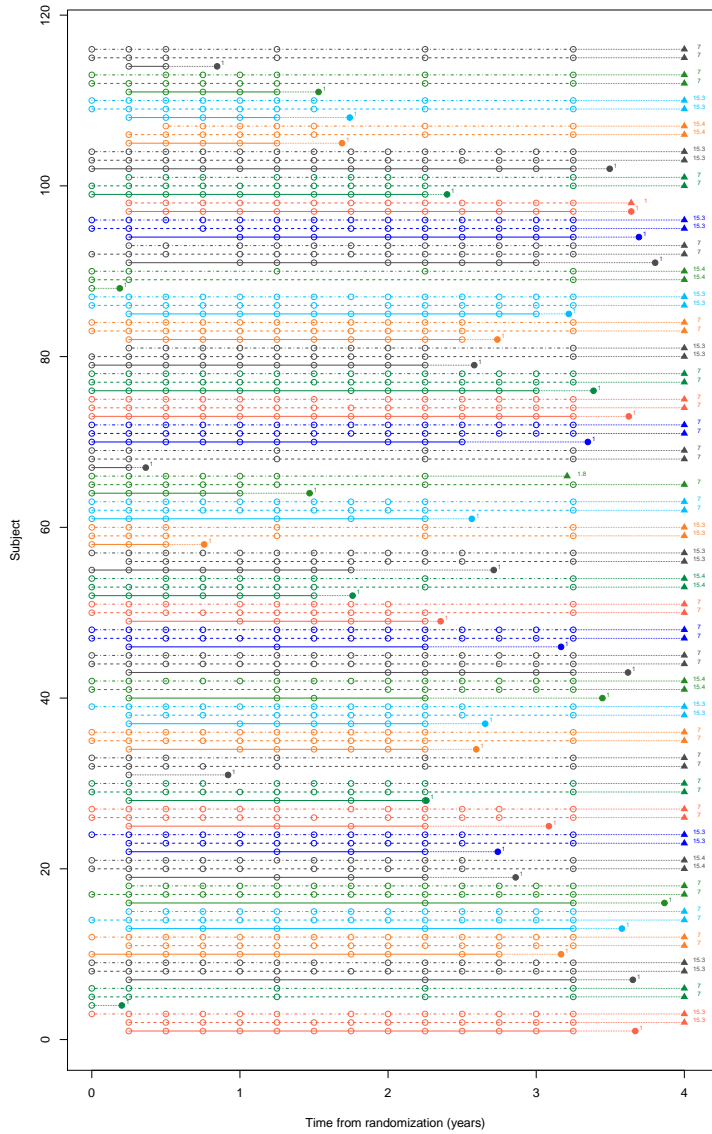

Fig. 1. An overview of the nested case-control sample of the HALT-C clinical trial. The visits where DCP marker was measured are shown as empty circles, the event times are shown as filled circles, and non-events (censoring times) as filled triangles. The subjects are grouped according to their matching in the nested case-control study, with subjects with the same color belonging to the same risk set. The estimated nested case-control inverse probability sampling weights are shown to the right of each event time for the cases, and censoring time for the non-events.

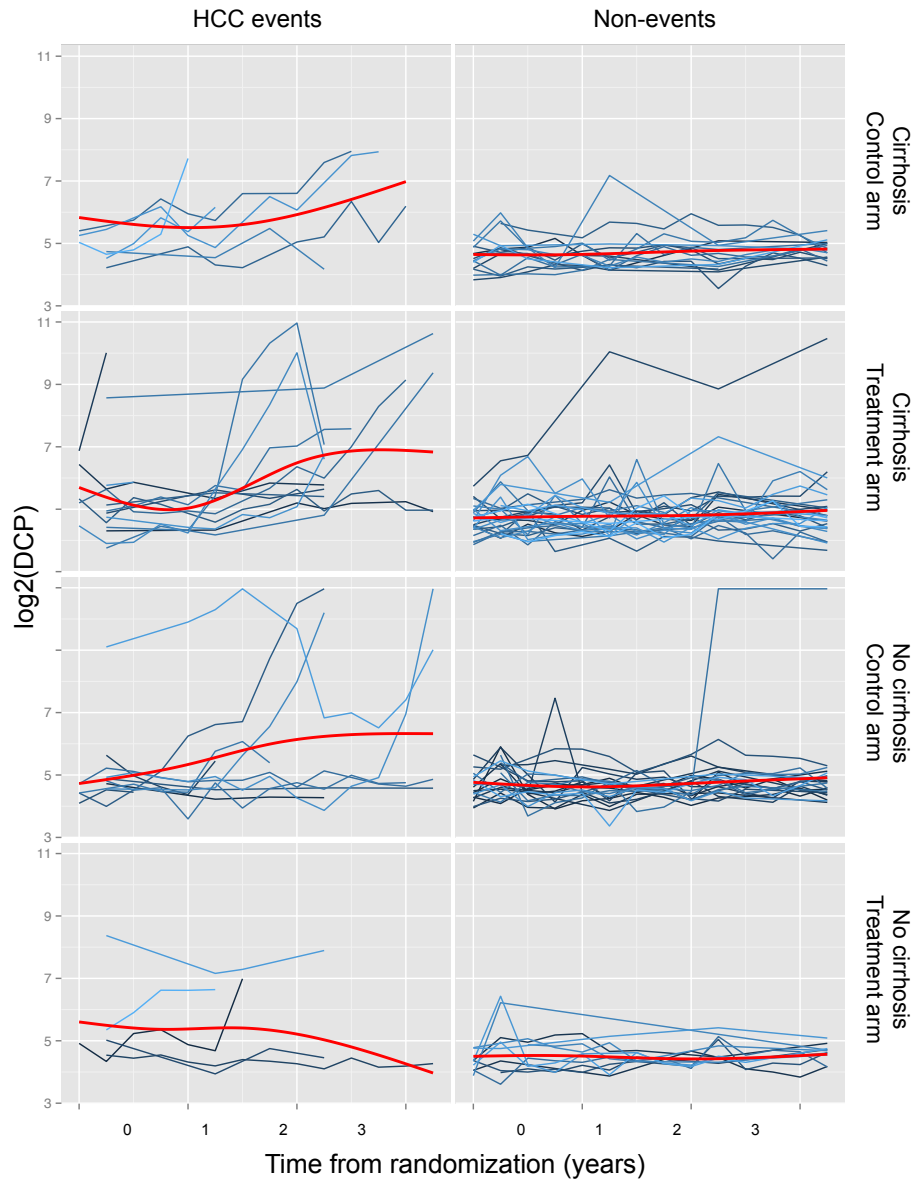

Fig. 2. The des- $\gamma$ -carboxyprothrombin (DCP) marker observations in nested case-control subset of the HALT-C clinical trial, stratified by cirrhosis and treatment assignment. The DCP values were truncated at 2000 units and  $\log_2$  transformed. The thick red lines indicate the conditional linear fit with time modeled as a spline with 3 degrees of freedom.

## APPENDIX E. RESULTS OF ANALYSIS OF EXAMPLE SIMULATED DATASETS

A tutorial where we show examples on how to obtain risk predictions based on longitudinal marker in a case-cohort or a nested case-control sample, using methods described the manuscript available at <http://rpubs.com/marlenamaziarz/risk-prediction-in-longitudinal-two-phase-studies>. The code for estimating the weights in CCH and NCC samples, obtaining risk predictions and evaluating those predictions, as well as example datasets for CCH and NCC are available in <https://github.com/marlenamaziarz/longitudinal-two-phase>. Specifically, the examples in the tutorial illustrate the use of our methods to predict risk using  $PC_{GLM}$  based on a longitudinal biomarker with a survival outcome, as well as all evaluation measures of prediction and their standard error discussed in the paper. Namely, the evaluation measures we considered are the prediction error (PE), true and false positive fractions (TPF and FPF), the area under the Receiver Operating Characteristics curve (AUC), the proportion of cases followed (PCF) and the proportion of cases needed to be followed (PNF). Below are results of the analysis using example (simulated) datasets.

*Nested case-control*



Table 1. Results of the nested case-control (NCC) analysis for different combinations of conditioning time ( $s$ ) and prediction time ( $t = s + \tau$ ) ( $s$  from 6 to 36 in increments of 6, and  $\tau = 6$ ). Prediction timeframe =  $\tau$ , Est = estimate, SE = standard error, n.case = number of cases in the sample at time  $s$ , n.ctrl = number of controls at  $s$ , and n.cens = number of subjects censored up to time  $s$ . SE was estimated based on 500 perturbations. PE = prediction error, TPF/FPF = true/false positive fraction, AUC = the area under the Receiver Operating Characteristics curve, PCF = the proportion of cases followed, and PNF = the proportion of cases needed to be followed. A tutorial on how to run this analysis can be found on Rpubs, the code and example datasets are on GitHub.

| Measure  | $s$ | $t$ | $\tau$ | Est  | SE   | n.case | n.ctrl | n.cens |
|----------|-----|-----|--------|------|------|--------|--------|--------|
| PE       | 6   | 12  | 6      | 0.03 | 0.00 | 53     | 512    | 8      |
| TPF(0.4) | 6   | 12  | 6      | 0.13 | 0.05 | 53     | 512    | 8      |
| FPF(0.3) | 6   | 12  | 6      | 0.01 | 0.00 | 53     | 512    | 8      |
| AUC      | 6   | 12  | 6      | 0.79 | 0.03 | 53     | 512    | 8      |
| PCF(0.2) | 6   | 12  | 6      | 0.55 | 0.07 | 53     | 512    | 8      |
| PNF(0.8) | 6   | 12  | 6      | 0.44 | 0.07 | 53     | 512    | 8      |
| PE       | 12  | 18  | 6      | 0.06 | 0.01 | 74     | 423    | 15     |
| TPF(0.4) | 12  | 18  | 6      | 0.24 | 0.06 | 74     | 423    | 15     |
| FPF(0.3) | 12  | 18  | 6      | 0.04 | 0.01 | 74     | 423    | 15     |
| AUC      | 12  | 18  | 6      | 0.83 | 0.02 | 74     | 423    | 15     |
| PCF(0.2) | 12  | 18  | 6      | 0.61 | 0.06 | 74     | 423    | 15     |
| PNF(0.8) | 12  | 18  | 6      | 0.35 | 0.06 | 74     | 423    | 15     |
| PE       | 18  | 24  | 6      | 0.10 | 0.01 | 89     | 310    | 24     |
| TPF(0.4) | 18  | 24  | 6      | 0.24 | 0.05 | 89     | 310    | 24     |
| FPF(0.3) | 18  | 24  | 6      | 0.09 | 0.02 | 89     | 310    | 24     |
| AUC      | 18  | 24  | 6      | 0.80 | 0.03 | 89     | 310    | 24     |
| PCF(0.2) | 18  | 24  | 6      | 0.56 | 0.05 | 89     | 310    | 24     |
| PNF(0.8) | 18  | 24  | 6      | 0.40 | 0.06 | 89     | 310    | 24     |
| PE       | 24  | 30  | 6      | 0.11 | 0.01 | 57     | 226    | 27     |
| TPF(0.4) | 24  | 30  | 6      | 0.22 | 0.06 | 57     | 226    | 27     |
| FPF(0.3) | 24  | 30  | 6      | 0.12 | 0.02 | 57     | 226    | 27     |
| AUC      | 24  | 30  | 6      | 0.78 | 0.03 | 57     | 226    | 27     |
| PCF(0.2) | 24  | 30  | 6      | 0.47 | 0.07 | 57     | 226    | 27     |
| PNF(0.8) | 24  | 30  | 6      | 0.46 | 0.05 | 57     | 226    | 27     |
| PE       | 30  | 36  | 6      | 0.12 | 0.01 | 50     | 145    | 31     |
| TPF(0.4) | 30  | 36  | 6      | 0.31 | 0.07 | 50     | 145    | 31     |
| FPF(0.3) | 30  | 36  | 6      | 0.12 | 0.03 | 50     | 145    | 31     |
| AUC      | 30  | 36  | 6      | 0.81 | 0.03 | 50     | 145    | 31     |
| PCF(0.2) | 30  | 36  | 6      | 0.47 | 0.06 | 50     | 145    | 31     |
| PNF(0.8) | 30  | 36  | 6      | 0.41 | 0.05 | 50     | 145    | 31     |
| PE       | 36  | 42  | 6      | 0.11 | 0.02 | 19     | 104    | 22     |
| TPF(0.4) | 36  | 42  | 6      | 0.37 | 0.11 | 19     | 104    | 22     |
| FPF(0.3) | 36  | 42  | 6      | 0.20 | 0.04 | 19     | 104    | 22     |
| AUC      | 36  | 42  | 6      | 0.72 | 0.06 | 19     | 104    | 22     |
| PCF(0.2) | 36  | 42  | 6      | 0.42 | 0.11 | 19     | 104    | 22     |
| PNF(0.8) | 36  | 42  | 6      | 0.53 | 0.07 | 19     | 104    | 22     |

*Case-cohort*

Table 2. Results of the case-cohort (CCH) analysis for different combinations of conditioning time ( $s$ ) and prediction time ( $t = s + \tau$ ) ( $s$  from 6 to 36 in increments of 6, and  $\tau = 6$ ). Prediction timeframe =  $\tau$ , Est = estimate, SE = standard error, n.case = number of cases in the sample at time  $s$ , n.ctrl = number of controls at  $s$ , and n.cens = number of subjects censored up to time  $s$ . SE was estimated based on 500 perturbations. PE = prediction error, TPF/FPF = true/false positive fraction, AUC = the area under the Receiver Operating Characteristics curve, PCF = the proportion of cases followed, and PNF = the proportion of cases needed to be followed. A tutorial on how to run this analysis can be found on Rpubs, the code and example datasets are on GitHub

| Measure  | $s$ | $t$ | $\tau$ | Est  | SE   | n.case | n <sub>ctrl</sub> | n.cens |
|----------|-----|-----|--------|------|------|--------|-------------------|--------|
| PE       | 6   | 12  | 6      | 0.04 | 0.00 | 74     | 639               | 124    |
| TPF(0.4) | 6   | 12  | 6      | 0.05 | 0.04 | 74     | 639               | 124    |
| FPF(0.3) | 6   | 12  | 6      | 0.01 | 0.00 | 74     | 639               | 124    |
| AUC      | 6   | 12  | 6      | 0.81 | 0.02 | 74     | 639               | 124    |
| PCF(0.2) | 6   | 12  | 6      | 0.61 | 0.06 | 74     | 639               | 124    |
| PNF(0.8) | 6   | 12  | 6      | 0.41 | 0.05 | 74     | 639               | 124    |
| PE       | 12  | 18  | 6      | 0.06 | 0.01 | 89     | 475               | 75     |
| TPF(0.4) | 12  | 18  | 6      | 0.14 | 0.06 | 89     | 475               | 75     |
| FPF(0.3) | 12  | 18  | 6      | 0.02 | 0.01 | 89     | 475               | 75     |
| AUC      | 12  | 18  | 6      | 0.83 | 0.02 | 89     | 475               | 75     |
| PCF(0.2) | 12  | 18  | 6      | 0.65 | 0.06 | 89     | 475               | 75     |
| PNF(0.8) | 12  | 18  | 6      | 0.36 | 0.07 | 89     | 475               | 75     |
| PE       | 18  | 24  | 6      | 0.10 | 0.01 | 104    | 326               | 45     |
| TPF(0.4) | 18  | 24  | 6      | 0.20 | 0.06 | 104    | 326               | 45     |
| FPF(0.3) | 18  | 24  | 6      | 0.05 | 0.01 | 104    | 326               | 45     |
| AUC      | 18  | 24  | 6      | 0.77 | 0.03 | 104    | 326               | 45     |
| PCF(0.2) | 18  | 24  | 6      | 0.45 | 0.05 | 104    | 326               | 45     |
| PNF(0.8) | 18  | 24  | 6      | 0.42 | 0.06 | 104    | 326               | 45     |
| PE       | 24  | 30  | 6      | 0.10 | 0.01 | 85     | 208               | 33     |
| TPF(0.4) | 24  | 30  | 6      | 0.28 | 0.07 | 85     | 208               | 33     |
| FPF(0.3) | 24  | 30  | 6      | 0.09 | 0.02 | 85     | 208               | 33     |
| AUC      | 24  | 30  | 6      | 0.83 | 0.03 | 85     | 208               | 33     |
| PCF(0.2) | 24  | 30  | 6      | 0.58 | 0.06 | 85     | 208               | 33     |
| PNF(0.8) | 24  | 30  | 6      | 0.33 | 0.07 | 85     | 208               | 33     |
| PE       | 30  | 36  | 6      | 0.11 | 0.01 | 54     | 128               | 26     |
| TPF(0.4) | 30  | 36  | 6      | 0.21 | 0.07 | 54     | 128               | 26     |
| FPF(0.3) | 30  | 36  | 6      | 0.09 | 0.03 | 54     | 128               | 26     |
| AUC      | 30  | 36  | 6      | 0.76 | 0.04 | 54     | 128               | 26     |
| PCF(0.2) | 30  | 36  | 6      | 0.53 | 0.07 | 54     | 128               | 26     |
| PNF(0.8) | 30  | 36  | 6      | 0.56 | 0.07 | 54     | 128               | 26     |
| PE       | 36  | 42  | 6      | 0.10 | 0.02 | 26     | 84                | 18     |
| TPF(0.4) | 36  | 42  | 6      | 0.22 | 0.10 | 26     | 84                | 18     |
| FPF(0.3) | 36  | 42  | 6      | 0.09 | 0.04 | 26     | 84                | 18     |
| AUC      | 36  | 42  | 6      | 0.70 | 0.07 | 26     | 84                | 18     |
| PCF(0.2) | 36  | 42  | 6      | 0.53 | 0.11 | 26     | 84                | 18     |
| PNF(0.8) | 36  | 42  | 6      | 0.69 | 0.16 | 26     | 84                | 18     |

## REFERENCES

- CAI, T. AND ZHENG, Y. (2011). Nonparametric evaluation of biomarker accuracy under nested case-control studies. *J. Am. Stat. Assoc. Journal of the American Statistical Association* **106**(494), 569–580.
- GRAY, ROBERT J. (2009). Weighted analyses for cohort sampling designs. *Lifetime Data Analysis* **15**(1), 24–40.
- LIU, DANDAN, CAI, TIANXI AND ZHENG, YINGYE. (2012). Evaluating the predictive value of biomarkers with stratified case-cohort design. *Biometrics* **68**(4), 1219–1227.
- SAMUELSEN, S. O. (1997). A pseudolikelihood approach to analysis of nested case-control studies. *Biometrika* **84**(2), 379–394.
- XU, QIANG, PAIK, MYUNGHEE CHO, LUO, XIAODONG AND TSAI, WEI-YANN. (2009). Reweighting estimators for cox regression with missing covariates. *Journal of the American Statistical Association* **104**(487), 1155–1167.
